# Supplementary material for: Prediction of Human Phenotype Ontology terms by means of hierarchical ensemble methods
Source: PubMed Central journal article supplement (PMC5639780; doi:10.1186/s12859-017-1854-y), 2017-10-12
Supplement: 12859_2017_1854_MOESM2_ESM.pdf [file 12859_2017_1854_MOESM2_ESM.pdf]

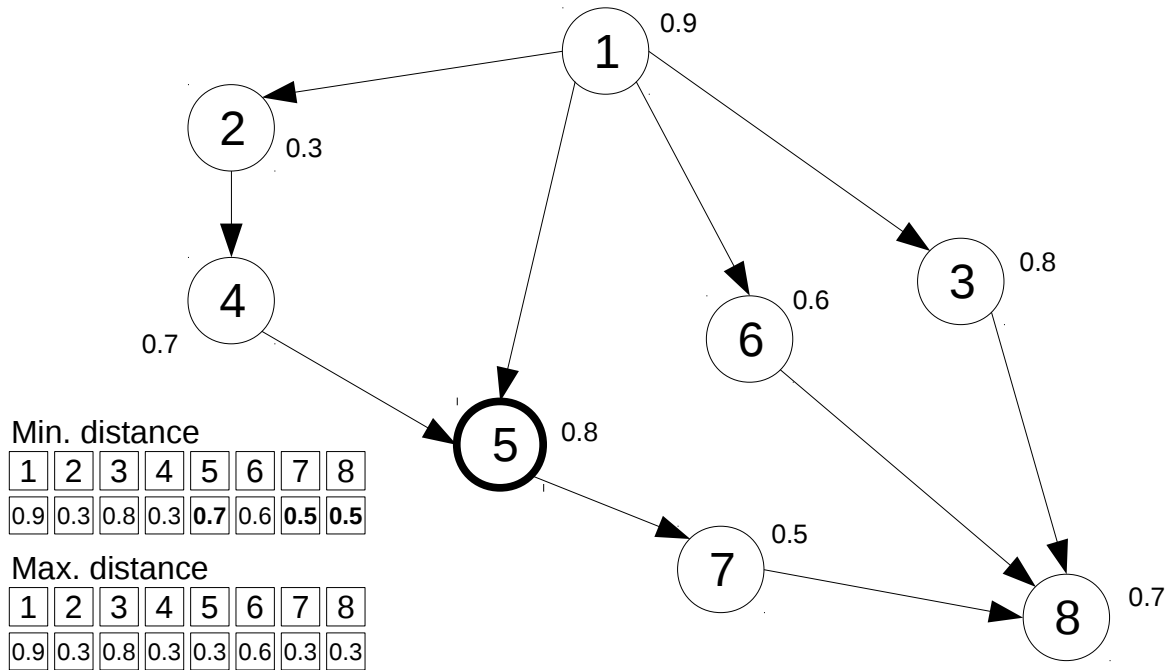

**Additional Figure 2:** Levels defined in terms of the minimum distance from the root (node 1) lead to inconsistent predictions. The small numbers close to nodes correspond to the  $\hat{y}_i$  scores of the flat predictions. The Hierarchical top-down scores obtained respectively by crossing the levels according to the minimum and the maximum distance from the root are shown in the bottom-left. Scores in boldface represent inconsistent predictions.
