# Supplementary material for: Prediction of Human Phenotype Ontology terms by means of hierarchical ensemble methods
Source: PubMed Central journal article supplement (PMC5639780; doi:10.1186/s12859-017-1854-y), 2017-10-12
Supplement: 12859_2017_1854_MOESM4_ESM.pdf [file 12859_2017_1854_MOESM4_ESM.pdf]

**Additional Table 1.** Average AUROC across terms and average  $F_{max}$ , Precision and Recall across genes of HTD and TPR ensemble variants using RANKS and SVMs as base learner and the STRING network. Results of “flat” RANKS and SVMs are also reported. Results are estimated through 5-fold cross-validation. For each sub-ontology and each metric best results are highlighted in bold. Results significantly better than all the others methods according to the Wilcoxon Rank Sum test ( $\alpha = 10^{-6}$ ) are underlined.

| Subontology        | Method       | AUROC         | $F_{max}$     | Precision     | Recall        |
|--------------------|--------------|---------------|---------------|---------------|---------------|
| <b>Organ</b>       | RANKS        | 0.8540        | 0.3048        | 0.2349        | 0.4338        |
|                    | SVM          | 0.7440        | 0.4188        | 0.3598        | 0.5008        |
|                    | HTD-RANKS    | 0.8812        | 0.3743        | 0.3041        | 0.4865        |
|                    | HTD-SVM      | 0.7475        | 0.4249        | 0.3739        | 0.4919        |
|                    | TPR-T-RANKS  | 0.8604        | 0.3775        | 0.3048        | 0.4973        |
|                    | TPR-T-SVM    | 0.7602        | 0.4318        | 0.3850        | 0.4931        |
|                    | TPR-D-RANKS  | 0.8598        | 0.3986        | 0.3409        | 0.4798        |
|                    | TPR-D-SVM    | 0.7723        | 0.4341        | <b>0.3883</b> | 0.4933        |
|                    | TPR-TF-RANKS | 0.8609        | 0.3752        | 0.3056        | 0.4858        |
|                    | TPR-TF-SVM   | 0.7584        | 0.4330        | 0.3696        | <u>0.5227</u> |
|                    | TPR-W-RANKS  | <b>0.8857</b> | 0.3999        | 0.3429        | 0.4805        |
|                    | TPR-W-SVM    | 0.7713        | <b>0.4354</b> | 0.3782        | 0.5107        |
| <b>Inheritance</b> | RANKS        | 0.8983        | 0.5601        | 0.4292        | 0.8061        |
|                    | SVM          | 0.8164        | 0.6835        | 0.5876        | 0.8167        |
|                    | HTD-RANKS    | 0.9005        | 0.5682        | 0.4392        | 0.8045        |
|                    | HTD-SVM      | 0.8101        | 0.6869        | 0.5892        | 0.8234        |
|                    | TPR-T-RANKS  | 0.9043        | 0.5718        | 0.4469        | 0.7950        |
|                    | TPR-T-SVM    | 0.8187        | 0.6894        | 0.5939        | 0.8219        |
|                    | TPR-D-RANKS  | 0.9044        | 0.5718        | 0.4469        | 0.7950        |
|                    | TPR-D-SVM    | 0.8187        | 0.6894        | 0.5939        | 0.8219        |
|                    | TPR-TF-RANKS | <b>0.9150</b> | 0.5385        | 0.4024        | 0.8139        |
|                    | TPR-TF-SVM   | 0.8254        | 0.6848        | 0.5854        | <b>0.8248</b> |
|                    | TPR-W-RANKS  | 0.9147        | 0.5718        | 0.4470        | 0.7950        |
|                    | TPR-W-SVM    | 0.8187        | <b>0.6898</b> | <b>0.5951</b> | 0.8208        |
| <b>Onset</b>       | RANKS        | 0.8325        | 0.4143        | 0.3025        | 0.6568        |
|                    | SVM          | 0.7365        | 0.4656        | 0.3689        | 0.6309        |
|                    | HTD-RANKS    | <b>0.8605</b> | 0.4174        | 0.2999        | 0.6861        |
|                    | HTD-SVM      | 0.7433        | 0.4584        | 0.3651        | 0.6156        |
|                    | TPR-T-RANKS  | 0.8575        | 0.4184        | 0.2926        | <u>0.7432</u> |
|                    | TPR-T-SVM    | 0.7432        | 0.4616        | 0.3691        | 0.6171        |
|                    | TPR-D-RANKS  | 0.8563        | 0.4372        | 0.3214        | 0.6868        |
|                    | TPR-D-SVM    | 0.7434        | 0.4618        | 0.3594        | 0.6528        |
|                    | TPR-TF-RANKS | 0.8580        | 0.4218        | 0.3046        | 0.6853        |
|                    | TPR-TF-SVM   | 0.7463        | 0.4668        | 0.3670        | 0.6410        |
|                    | TPR-W-RANKS  | 0.8573        | 0.4401        | 0.3264        | 0.7004        |
|                    | TPR-W-SVM    | 0.7442        | <b>0.4770</b> | <b>0.3741</b> | 0.6644        |
