# Supplementary material for: Prediction of Human Phenotype Ontology terms by means of hierarchical ensemble methods
Source: PubMed Central journal article supplement (PMC5639780; doi:10.1186/s12859-017-1854-y), 2017-10-12
Supplement: 12859_2017_1854_MOESM6_ESM.pdf [file 12859_2017_1854_MOESM6_ESM.pdf]

**Additional Table 3.** Prediction of newly annotated genes. Average AUROC and AUPRC across 2444 HPO terms and average  $F_{max}$ , Precision and Recall of HTD and TPR ensemble variants across the newly annotated 608 genes. Best results for each metric are highlighted in bold.

| Meas.<br>Methods | AUROC         | AUPRC         | $F_{max}$     | Precision     | Recall        |
|------------------|---------------|---------------|---------------|---------------|---------------|
| <i>HTD</i>       | 0.6464        | 0.1207        | 0.3794        | 0.3581        | 0.4033        |
| <i>TPR-T</i>     | 0.6466        | 0.1209        | 0.3795        | 0.3580        | 0.4036        |
| <i>TPR-D</i>     | 0.6465        | 0.1211        | 0.3794        | <b>0.3584</b> | 0.4030        |
| <i>TPR-TF</i>    | 0.6498        | 0.1224        | 0.3812        | 0.3560        | 0.4101        |
| <i>TPR-W</i>     | <b>0.6512</b> | <b>0.1237</b> | <b>0.3826</b> | 0.3512        | <b>0.4202</b> |
