# Supplementary material for: Prediction of Human Phenotype Ontology terms by means of hierarchical ensemble methods
Source: PubMed Central journal article supplement (PMC5639780; doi:10.1186/s12859-017-1854-y), 2017-10-12
Supplement: 12859_2017_1854_MOESM7_ESM.pdf [file 12859_2017_1854_MOESM7_ESM.pdf]

**Additional Table 4.** Comparison among HTD and TPR ensemble variants considering only the best predictions for the newly annotated genes. Average AUROC and AUPRC across terms and average  $F_{max}$ , Precision and Recall across genes considering only HPO terms with AUROC > 0.7 (778 terms) and  $F_{max}$  > 0.3 (296 genes). Best results for each metric are highlighted in bold.

| Meas.<br>Methods | AUROC         | AUPRC         | $F_{max}$     | Precision     | Recall        |
|------------------|---------------|---------------|---------------|---------------|---------------|
| <i>HTD</i>       | 0.8155        | 0.1551        | 0.4716        | 0.4429        | 0.5042        |
| <i>TPR-T</i>     | 0.8155        | 0.1553        | 0.4714        | 0.4443        | 0.5021        |
| <i>TPR-D</i>     | 0.8155        | 0.1554        | 0.4714        | 0.4436        | 0.5030        |
| <i>TPR-TF</i>    | 0.8200        | 0.1577        | 0.4765        | 0.4419        | <b>0.5171</b> |
| <i>TPR-W</i>     | <b>0.8219</b> | <b>0.1594</b> | <b>0.4793</b> | <b>0.4572</b> | 0.5037        |
