# Supplementary material for: Prediction of Human Phenotype Ontology terms by means of hierarchical ensemble methods
Source: PubMed Central journal article supplement (PMC5639780; doi:10.1186/s12859-017-1854-y), 2017-10-12
Supplement: 12859_2017_1854_MOESM9_ESM.pdf [file 12859_2017_1854_MOESM9_ESM.pdf]

**Additional Table 6:** Top 5 candidate genes for each of the 65 leaf nodes showed in the additional file 8. See the main manuscript for more details about the selection of the candidate genes for each HPO leaf term.

| HPO ID     | HPO term                                       | Entrez Gene ID | Gene Symbol |
|------------|------------------------------------------------|----------------|-------------|
| HP:0004942 | Aortic aneurysm                                | 72             | ACTG2       |
| HP:0100760 | Clubbing of toes                               | 7516           | XRCC2       |
| HP:0000114 | Proximal tubulopathy                           | 1892           | ECHS1       |
| HP:0003557 | Increased variability in muscle fiber diameter | 8516           | ITGA8       |
|            |                                                | 3694           | ITGB6       |
| HP:0002040 | Esophageal varix                               | 85440          | DOCK7       |
|            |                                                | 7049           | TGFBR3      |
| HP:0002913 | Myoglobinuria                                  | 1962           | EHHADH      |
|            |                                                | 1892           | ECHS1       |
| HP:0003642 | Type I transferrin isoform profile             | 201595         | STT3B       |
|            |                                                | 1109           | AKR1C4      |
|            |                                                | 199857         | ALG14       |
| HP:0006965 | Acute necrotizing encephalopathy               | 4697           | NDUFA4      |
|            |                                                | 4539           | MT-ND4L     |
| HP:0008316 | Abnormal mitochondria in muscle tissue         | 4697           | NDUFA4      |
|            |                                                | 51204          | TACO1       |
|            |                                                | 1352           | COX10       |
|            |                                                | 4539           | MT-ND4L     |
| HP:0004339 | Abnormality of sulfur amino acid metabolism    | 4538           | MT-ND4      |
|            |                                                | 1757           | SARDH       |
|            |                                                | 55811          | ADCY10      |
|            |                                                | 1137           | CHRNA4      |
|            |                                                | 271            | AMPD2       |
| HP:0004944 | Cerebral aneurysm                              | 272            | AMPD3       |
|            |                                                | 1757           | SARDH       |
|            |                                                | 55811          | ADCY10      |
|            |                                                | 91137          | SLC25A46    |
|            |                                                | 271            | AMPD2       |
| HP:0002725 | Systemic lupus erythematosus                   | 272            | AMPD3       |
| HP:0001659 | Aortic regurgitation                           | 629            | CFB         |
|            |                                                | 27229          | TUBGCP4     |
|            |                                                | 2239           | GPC4        |
|            |                                                | 3340           | NDST1       |
|            |                                                | 57822          | GRHL3       |
| HP:0004353 | Abnormality of pyrimidine metabolism           | 5378           | PMS1        |
|            |                                                | 790            | CAD         |
|            |                                                | 7516           | XRCC2       |
|            |                                                | 580            | BARD1       |
|            |                                                | 10747          | MASP2       |
| HP:0000831 | Insulin-resistant diabetes mellitus            | 58484          | NLRC4       |
|            |                                                | 3991           | LIPE        |
|            |                                                | 3764           | KCNJ8       |
| HP:0001019 | Erythroderma                                   | 5260           | PHKG1       |
|            |                                                | 3149           | HMGB3       |
|            |                                                | 7516           | XRCC2       |
|            |                                                | 5657           | PRTN3       |
|            |                                                | 28952          | CCDC22      |
|            |                                                | 2224           | FDPS        |

| HPO ID     | HPO term                                                   | Entrez Gene ID | Gene Symbol |
|------------|------------------------------------------------------------|----------------|-------------|
| HP:0002223 | Absent eyebrow                                             | 9463           | PICK1       |
|            |                                                            | 389549         | FEZF1       |
| HP:0004481 | Progressive macrocephaly                                   | 4697           | NDUFA4      |
|            |                                                            | 4538           | MT-ND4      |
|            |                                                            | 54539          | NDUFB11     |
|            |                                                            | 4539           | MT-ND4L     |
| HP:0010459 | True hermaphroditism                                       | 54585          | LZTFL1      |
|            |                                                            | 9786           | KIAA0586    |
|            |                                                            | 11020          | IFT27       |
|            |                                                            | 57822          | GRHL3       |
|            |                                                            | 26281          | FGF20       |
| HP:0003521 | Disproportionate short-trunk short stature                 | 54567          | DLL4        |
|            |                                                            | 3371           | TNC         |
|            |                                                            | 9096           | TBX18       |
| HP:0010996 | Abnormality of monocarboxylic acid metabolism              | 790            | CAD         |
| HP:0000991 | Xanthomatosis                                              | 9971           | NR1H4       |
|            |                                                            | 4047           | LSS         |
|            |                                                            | 3991           | LIPE        |
|            |                                                            | 80347          | COASY       |
|            |                                                            | 4744           | NEFH        |
| HP:0003645 | Prolonged partial thromboplastin time                      | 2266           | FGG         |
|            |                                                            | 3026           | HABP2       |
|            |                                                            | 10747          | MASP2       |
|            |                                                            | 733            | C8G         |
|            |                                                            | 199857         | ALG14       |
| HP:0009161 | Aplasia/Hypoplasia of the middle phalanx of the 5th finger | 26585          | GREM1       |
|            |                                                            | 2535           | FZD2        |
|            |                                                            | 57216          | VANGL2      |
| HP:0003076 | Glycosuria                                                 | 140628         | GATA5       |
|            |                                                            | 388753         | COA6        |
| HP:0002304 | Akinesia                                                   | 1139           | CHRNA7      |
|            |                                                            | 9037           | SEMA5A      |
|            |                                                            | 54567          | DLL4        |
|            |                                                            | 8506           | CNTNAPI     |
|            |                                                            | 3763           | KCNJ6       |
| HP:0003974 | Absent radius                                              | 6909           | TBX2        |
|            |                                                            | 26585          | GREM1       |
|            |                                                            | 7468           | WHSC1       |
|            |                                                            | 23129          | PLXND1      |
|            |                                                            | 6997           | TDGF1       |
| HP:0003215 | Dicarboxylic aciduria                                      | 1962           | EHHADH      |
|            |                                                            | 1892           | ECHS1       |
|            |                                                            | 3417           | IDH1        |
|            |                                                            | 4329           | ALDH6A1     |
|            |                                                            | 126129         | CPT1C       |
| HP:0002085 | Occipital encephalocele                                    | 284217         | LAMA1       |
|            |                                                            | 1109           | AKR1C4      |
|            |                                                            | 85301          | COL27A1     |
|            |                                                            | 8516           | ITGA8       |
|            |                                                            | 3694           | ITGB6       |
| HP:0000677 | Oligodontia                                                | 25885          | POLR1A      |
|            |                                                            | 2535           | FZD2        |
|            |                                                            | 7161           | TP73        |
|            |                                                            | 7049           | TGFBR3      |

| HPO ID     | HPO term                                       | Entrez Gene ID | Gene Symbol |
|------------|------------------------------------------------|----------------|-------------|
|            |                                                | 28952          | CCDC22      |
| HP:0001218 | Autoamputation                                 | 4916           | NTRK3       |
|            |                                                | 51164          | DCTN4       |
|            |                                                | 10715          | CERS1       |
|            |                                                | 127833         | SYT2        |
|            |                                                | 10087          | COL4A3BP    |
| HP:0003254 | Abnormality of DNA repair                      | 7516           | XRCC2       |
|            |                                                | 4437           | MSH3        |
|            |                                                | 7469           | NELFA       |
|            |                                                | 580            | BARD1       |
|            |                                                | 79991          | STN1        |
| HP:0100864 | Short femoral neck                             | 11020          | IFT27       |
|            |                                                | 2239           | GPC4        |
|            |                                                | 283375         | SLC39A5     |
|            |                                                | 2817           | GPC1        |
|            |                                                | 22978          | NT5C2       |
| HP:0009027 | Foot dorsiflexor weakness                      | 56776          | FMN2        |
|            |                                                | 4744           | NEFH        |
|            |                                                | 5859           | QARS        |
| HP:0002905 | Hyperphosphatemia                              | 844            | CASQ1       |
|            |                                                | 26281          | FGF20       |
|            |                                                | 6809           | STX3        |
|            |                                                | 80055          | PGAP1       |
| HP:0002839 | Urinary bladder sphincter dysfunction          | 25894          | PLEKHG4     |
|            |                                                | 81570          | CLPB        |
|            |                                                | 6327           | SCN2B       |
|            |                                                | 23025          | UNC13A      |
|            |                                                | 27445          | PCLO        |
| HP:0009617 | Abnormality of the distal phalanx of the thumb | 2619           | GAS1        |
|            |                                                | 26585          | GREM1       |
|            |                                                | 57216          | VANGL2      |
|            |                                                | 22978          | NT5C2       |
|            |                                                | 84976          | DISP1       |
| HP:0002097 | Emphysema                                      | 5450           | POU2AF1     |
|            |                                                | 3105           | HLA-A       |
|            |                                                | 7049           | TGFBR3      |
| HP:0100631 | Neoplasm of the adrenal gland                  | 1021           | CDK6        |
|            |                                                | 7468           | WHSC1       |
|            |                                                | 3481           | IGF2        |
| HP:0000073 | Ureteral duplication                           | 9091           | PIGQ        |
|            |                                                | 7161           | TP73        |
|            |                                                | 126129         | CPT1C       |
|            |                                                | 1962           | EHHADH      |
|            |                                                | 284098         | PIGW        |
| HP:0002181 | Cerebral edema                                 | 790            | CAD         |
|            |                                                | 4697           | NDUFA4      |
|            |                                                | 4538           | MT-ND4      |
|            |                                                | 4539           | MT-ND4L     |
|            |                                                | 1892           | ECHS1       |
| HP:0002557 | Hypoplastic nipples                            | 9091           | PIGQ        |
|            |                                                | 6909           | TBX2        |
|            |                                                | 4040           | LRP6        |
|            |                                                | 284098         | PIGW        |
|            |                                                | 120            | ADD3        |

| HPO ID     | HPO term                             | Entrez Gene ID | Gene Symbol |
|------------|--------------------------------------|----------------|-------------|
| HP:0004359 | Abnormality of fatty-acid metabolism | 1962           | EHHADH      |
|            |                                      | 1892           | ECHS1       |
|            |                                      | 126129         | CPT1C       |
|            |                                      | 4329           | CPT1C       |
|            |                                      | 57468          | SLC12A5     |
| HP:0009720 | Adenoma sebaceum                     | 2475           | MTOR        |
|            |                                      | 4437           | MSH3        |
|            |                                      | 2272           | FHIT        |
|            |                                      | 5293           | PIK3CD      |
|            |                                      | 5378           | PMS1        |
| HP:0003233 | Hypoalphalipoproteinemia             | 9971           | NR1H4       |
|            |                                      | 3991           | LIPE        |
|            |                                      | 5260           | PHKG1       |
|            |                                      | 27229          | TUBGCP4     |
|            |                                      | 5446           | PON3        |
| HP:0010980 | Hyperlipoproteinemia                 | 9971           | NR1H4       |
|            |                                      | 5446           | PON3        |
|            |                                      | 8694           | DGAT1       |
|            |                                      | 5445           | PON2        |
| HP:0003002 | Breast carcinoma                     | 4437           | MSH3        |
| HP:0001480 | Freckling                            | 4437           | MSH3        |
|            |                                      | 5378           | PMS1        |
|            |                                      | 7161           | TP73        |
|            |                                      | 1021           | CDK6        |
|            |                                      | 1031           | CDKN2C      |
| HP:0005293 | Venous insufficiency                 | 54567          | DLL4        |
|            |                                      | 1303           | COL12A1     |
|            |                                      | 1399           | CRKL        |
|            |                                      | 3371           | TNC         |
|            |                                      | 6678           | SPARC       |
| HP:0006443 | Patellar aplasia                     | 7994           | KAT6A       |
| HP:0002025 | Anal stenosis                        | 6909           | TBX2        |
|            |                                      | 80055          | PGAP1       |
| HP:0009888 | Abnormality of secondary sexual hair | 6909           | TBX2        |
|            |                                      | 7161           | TP73        |
|            |                                      | 4744           | NEFH        |
|            |                                      | 4047           | LSS         |
|            |                                      | 6862           | T           |
| HP:0003311 | Hypoplasia of the odontoid process   | 3371           | TNC         |
|            |                                      | 4774           | NFIA        |
|            |                                      | 22926          | ATF6        |
|            |                                      | 8239           | USP9X       |
|            |                                      | 26137          | ZBTB20      |
| HP:0004311 | Abnormality of macrophages           | 2214           | FCGR3A      |
|            |                                      | 330            | BIRC3       |
|            |                                      | 4671           | NAIP        |
|            |                                      | 58484          | NLRC4       |
|            |                                      | 6809           | STX3        |
| HP:0001974 | Leukocytosis                         | 3551           | IKBKB       |
|            |                                      | 3932           | LCK         |
|            |                                      | 5657           | PRTN3       |
|            |                                      | 58484          | NLRC4       |
|            |                                      | 330            | BIRC3       |

| HPO ID     | HPO term                                              | Entrez Gene ID | Gene Symbol |
|------------|-------------------------------------------------------|----------------|-------------|
| HP:0100578 | Lipoatrophy                                           | 3991           | LIPE        |
|            |                                                       | 23022          | PALLD       |
|            |                                                       | 844            | CASQ1       |
|            |                                                       | 29119          | CTNNA3      |
|            |                                                       | 6006           | RHCE        |
| HP:0000625 | Cleft eyelid                                          | 23129          | PLXND1      |
|            |                                                       | 246243         | RNASEH1     |
|            |                                                       | 9463           | PICK1       |
|            |                                                       | 25885          | POLR1A      |
|            |                                                       | 10512          | SEMA3C      |
| HP:0007361 | Abnormality of the pons                               | 5297           | PI4KA       |
|            |                                                       | 9091           | PIGQ        |
|            |                                                       | 284098         | PIGW        |
|            |                                                       | 80055          | PGAP1       |
|            |                                                       | 163786         | SASS6       |
| HP:0002667 | Nephroblastoma (Wilms tumor)                          | 580            | BARD1       |
| HP:0002612 | Congenital hepatic fibrosis                           | 11020          | CYP4B1      |
|            |                                                       | 54585          | LZTFL1      |
|            |                                                       | 85440          | 85440       |
|            |                                                       | 51164          | DCTN4       |
|            |                                                       | 55690          | PACS1       |
| HP:0002967 | Cubitus valgus                                        | 26585          | GREM1       |
|            |                                                       | 26281          | FGF20       |
| HP:0010286 | Abnormality of the salivary glands                    | 4437           | MSH3        |
|            |                                                       | 7161           | TP73        |
|            |                                                       | 5378           | PMS1        |
|            |                                                       | 2272           | FHIT        |
|            |                                                       | 3417           | IDH1        |
| HP:0010675 | Abnormal foot bone ossification                       | 4047           | LSS         |
|            |                                                       | 3149           | HMGB3       |
|            |                                                       | 440275         | EIF2AK4     |
|            |                                                       | 389549         | FEZF1       |
|            |                                                       | 22926          | ATF6        |
| HP:0010899 | Abnormality of aspartate family amino acid metabolism | 1757           | SARDH       |
|            |                                                       | 55811          | ADCY10      |
|            |                                                       | 271            | AMPD2       |
|            |                                                       | 272            | AMPD3       |
|            |                                                       | 91137          | SLC25A46    |
| HP:0002922 | Increased CSF protein                                 | 57468          | SLC12A5     |
|            |                                                       | 3106           | HLA-B       |
|            |                                                       | 3105           | HLA-A       |
|            |                                                       | 4179           | CD46        |
|            |                                                       | 283375         | SLC39A5     |
