# Supplementary material for: Prediction of Human Phenotype Ontology terms by means of hierarchical ensemble methods
Source: BMC Bioinformatics. 2017 Oct 12;18:449. doi: 10.1186/s12859-017-1854-y (PMC5639780; doi:10.1186/s12859-017-1854-y)
Supplement: Supplementary file 8 — Best predicted HPO terms sorted in descending order on the basis of AUROC. (PDF 80.3 kb) [file 12859_2017_1854_MOESM8_ESM.pdf]

**Additional Table 5:** The best predicted HPO terms sorted in descending order on the basis of AUROC. Depth stands for the maximum distance of a given term from the root node (in the considered HPO graph the longest path from a node to a root is 14). Distance from leaves indicates the minimum distance of a given node from one of the leaves of the HPO-DAG. A value equal to 0 is assigned to the leaves, 1 to nodes with distance 1 from a leaf and so on.

| HPO ID     | HPO term                                                   | AUROC  | Depth | Distance from Leaves |
|------------|------------------------------------------------------------|--------|-------|----------------------|
| HP:0004942 | Aortic aneurysm                                            | 1.000  | 7     | 0                    |
| HP:0100760 | Clubbing of toes                                           | 1.000  | 9     | 0                    |
| HP:0000114 | Proximal tubulopathy                                       | 0.9984 | 9     | 0                    |
| HP:0003557 | Increased variability in muscle fiber diameter             | 0.9984 | 6     | 0                    |
| HP:0002040 | Esophageal varix                                           | 0.9967 | 7     | 0                    |
| HP:0002913 | Myoglobinuria                                              | 0.9967 | 6     | 0                    |
| HP:0003642 | Type I transferrin isoform profile                         | 0.9967 | 8     | 0                    |
| HP:0006477 | Abnormality of the alveolar ridges                         | 0.9967 | 7     | 1                    |
| HP:0006846 | Acute encephalopathy                                       | 0.9967 | 5     | 1                    |
| HP:0006965 | Acute necrotizing encephalopathy                           | 0.9967 | 6     | 0                    |
| HP:0008316 | Abnormal mitochondria in muscle tissue                     | 0.9967 | 6     | 0                    |
| HP:0004339 | Abnormality of sulfur amino acid metabolism                | 0.9967 | 5     | 0                    |
| HP:0004944 | Cerebral aneurysm                                          | 0.9967 | 8     | 0                    |
| HP:0002725 | Systemic lupus erythematosus                               | 0.9967 | 5     | 0                    |
| HP:0001659 | Aortic regurgitation                                       | 0.9951 | 7     | 0                    |
| HP:0004353 | Abnormality of pyrimidine metabolism                       | 0.9951 | 4     | 0                    |
| HP:0000831 | Insulin-resistant diabetes mellitus                        | 0.9934 | 6     | 0                    |
| HP:0001019 | Erythroderma                                               | 0.9934 | 7     | 0                    |
| HP:0002223 | Absent eyebrow                                             | 0.9934 | 9     | 0                    |
| HP:0003160 | Abnormal isoelectric focusing of serum transferrin         | 0.9934 | 7     | 1                    |
| HP:0004481 | Progressive macrocephaly                                   | 0.9934 | 9     | 0                    |
| HP:0010459 | True hermaphroditism                                       | 0.9934 | 7     | 0                    |
| HP:0012345 | Abnormal glycosylation                                     | 0.9934 | 4     | 4                    |
| HP:0012346 | Abnormal protein glycosylation                             | 0.9934 | 5     | 3                    |
| HP:0012347 | Abnormal protein N-linked glycosylation                    | 0.9934 | 6     | 2                    |
| HP:0003521 | Disproportionate short-trunk short stature                 | 0.9926 | 6     | 0                    |
| HP:0010996 | Abnormality of monocarboxylic acid metabolism              | 0.9918 | 4     | 0                    |
| HP:0000991 | Xanthomatosis                                              | 0.9901 | 6     | 0                    |
| HP:0003645 | Prolonged partial thromboplastin time                      | 0.9901 | 4     | 0                    |
| HP:0009161 | Aplasia/Hypoplasia of the middle phalanx of the 5th finger | 0.9885 | 11    | 0                    |
| HP:0010932 | Abnormality of nucleobase metabolism                       | 0.9885 | 3     | 1                    |
| HP:0003076 | Glycosuria                                                 | 0.9869 | 7     | 0                    |
| HP:0011016 | Abnormality of urine glucose concentration                 | 0.9869 | 6     | 1                    |
| HP:0002304 | Akinesia                                                   | 0.9868 | 6     | 0                    |
| HP:0003953 | Absent forearm bone                                        | 0.9868 | 9     | 1                    |
| HP:0003974 | Absent radius                                              | 0.9868 | 10    | 0                    |
| HP:0009822 | Aplasia involving forearm bones                            | 0.9868 | 9     | 1                    |
| HP:0003215 | Dicarboxylic aciduria                                      | 0.9868 | 8     | 0                    |
| HP:0010995 | Abnormality of dicarboxylic acid metabolism                | 0.9868 | 4     | 1                    |
| HP:0004219 | Abnormality of the middle phalanx of the 5th finger        | 0.9852 | 10    | 1                    |
| HP:0002085 | Occipital encephalocele                                    | 0.9835 | 8     | 0                    |
| HP:0000677 | Oligodontia                                                | 0.9819 | 10    | 0                    |
| HP:0001218 | Autoamputation                                             | 0.9819 | 3     | 0                    |
| HP:0003254 | Abnormality of DNA repair                                  | 0.9819 | 4     | 0                    |
| HP:0100864 | Short femoral neck                                         | 0.9819 | 10    | 0                    |
| HP:0009027 | Foot dorsiflexor weakness                                  | 0.9810 | 7     | 0                    |
| HP:0009108 | Foot dorsiflexor weakness                                  | 0.9802 | 9     | 1                    |

| HPO ID     | HPO term                                                | AUROC  | Depth | Distance from Leaves |
|------------|---------------------------------------------------------|--------|-------|----------------------|
| HP:0002905 | Hyperphosphatemia                                       | 0.9802 | 5     | 0                    |
| HP:0001436 | Abnormality of the foot musculature                     | 0.9794 | 5     | 1                    |
| HP:0002839 | Urinary bladder sphincter dysfunction                   | 0.9786 | 7     | 0                    |
| HP:0009617 | Abnormality of the distal phalanx of the thumb          | 0.9786 | 11    | 0                    |
| HP:0002097 | Emphysema                                               | 0.9785 | 5     | 0                    |
| HP:0100631 | Neoplasm of the adrenal gland                           | 0.9781 | 5     | 0                    |
| HP:0000073 | Ureteral duplication                                    | 0.9769 | 6     | 0                    |
| HP:0002181 | Cerebral edema                                          | 0.9769 | 8     | 0                    |
| HP:0002557 | Hypoplastic nipples                                     | 0.9753 | 5     | 0                    |
| HP:0004359 | Abnormality of fatty-acid metabolism                    | 0.9753 | 4     | 0                    |
| HP:0009720 | Adenoma sebaceum                                        | 0.9736 | 8     | 0                    |
| HP:0010615 | Angiofibromas                                           | 0.9736 | 7     | 1                    |
| HP:0003233 | Hypoalphalipoproteinemia                                | 0.9730 | 7     | 0                    |
| HP:0010980 | Hyperlipoproteinemia                                    | 0.9727 | 6     | 0                    |
| HP:0003002 | Breast carcinoma                                        | 0.9723 | 5     | 0                    |
| HP:0001480 | Freckling                                               | 0.9720 | 6     | 0                    |
| HP:0005293 | Venous insufficiency                                    | 0.9720 | 5     | 0                    |
| HP:0005613 | Aplasia/hypoplasia of the femur                         | 0.9720 | 8     | 2                    |
| HP:0006443 | Patellar aplasia                                        | 0.9719 | 9     | 0                    |
| HP:0002025 | Anal stenosis                                           | 0.9711 | 8     | 0                    |
| HP:0002298 | Absent hair                                             | 0.9711 | 6     | 1                    |
| HP:0007431 | Congenital ichthyosiform erythroderma                   | 0.9703 | 8     | 1                    |
| HP:0001992 | Organic aciduria                                        | 0.9703 | 7     | 1                    |
| HP:0006498 | Aplasia/Hypoplasia of the patella                       | 0.9691 | 8     | 1                    |
| HP:0003310 | Abnormality of the odontoid process                     | 0.9686 | 6     | 1                    |
| HP:0009888 | Abnormality of secondary sexual hair                    | 0.9678 | 5     | 0                    |
| HP:0003311 | Hypoplasia of the odontoid process                      | 0.9671 | 7     | 0                    |
| HP:0010979 | Abnormality of the level of lipoprotein cholesterol     | 0.9661 | 5     | 1                    |
| HP:0002898 | Embryonal neoplasm                                      | 0.9655 | 4     | 1                    |
| HP:0004311 | Abnormality of macrophages                              | 0.9653 | 6     | 0                    |
| HP:0001974 | Leukocytosis                                            | 0.9638 | 6     | 0                    |
| HP:0100578 | Lipoatrophy                                             | 0.9638 | 5     | 0                    |
| HP:0000625 | Cleft eyelid                                            | 0.9631 | 8     | 0                    |
| HP:0007361 | Abnormality of the pons                                 | 0.9625 | 8     | 0                    |
| HP:0010981 | Hypolipoproteinemia                                     | 0.9625 | 6     | 1                    |
| HP:0002667 | Nephroblastoma (Wilms tumor)                            | 0.9615 | 8     | 0                    |
| HP:0002612 | Congenital hepatic fibrosis                             | 0.9576 | 6     | 0                    |
| HP:0012144 | Abnormality of cells of the monocyte/macrophage lineage | 0.9570 | 4     | 1                    |
| HP:0011794 | Embryonal renal neoplasm                                | 0.9569 | 7     | 1                    |
| HP:0009733 | Glioma                                                  | 0.9555 | 7     | 1                    |
| HP:0002967 | Cubitus valgus                                          | 0.9541 | 7     | 0                    |
| HP:0012072 | Aciduria                                                | 0.9539 | 6     | 2                    |
| HP:0010286 | Abnormality of the salivary glands                      | 0.9539 | 7     | 0                    |
| HP:0010675 | Abnormal foot bone ossification                         | 0.9539 | 7     | 0                    |
| HP:0010899 | Abnormality of aspartate family amino acid metabolism   | 0.9539 | 5     | 0                    |
| HP:0002922 | Increased CSF protein                                   | 0.9522 | 6     | 0                    |
| HP:0000855 | Insulin resistance                                      | 0.9516 | 5     | 1                    |
